# Supplementary material
Source: PubMed Central journal article supplement (PMC6037204)
Supplement: mmc1.pdf [file mmc1.pdf]

**YMTHE, Volume 26**

**Supplemental Information**

**Local Immunomodulation with Anti-inflammatory**

**Cytokine-Encoding Lentivirus Enhances**

**Functional Recovery after Spinal Cord Injury**

**Jonghyuck Park, Joseph T. Decker, Daniel J. Margul, Dominique R. Smith, Brian J. Cummings, Aileen J. Anderson, and Lonnie D. Shea**

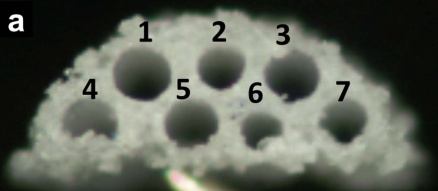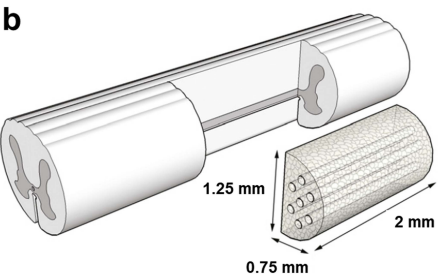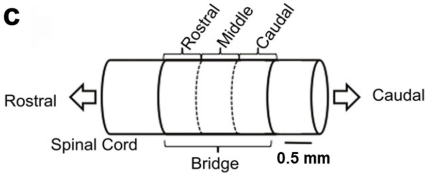

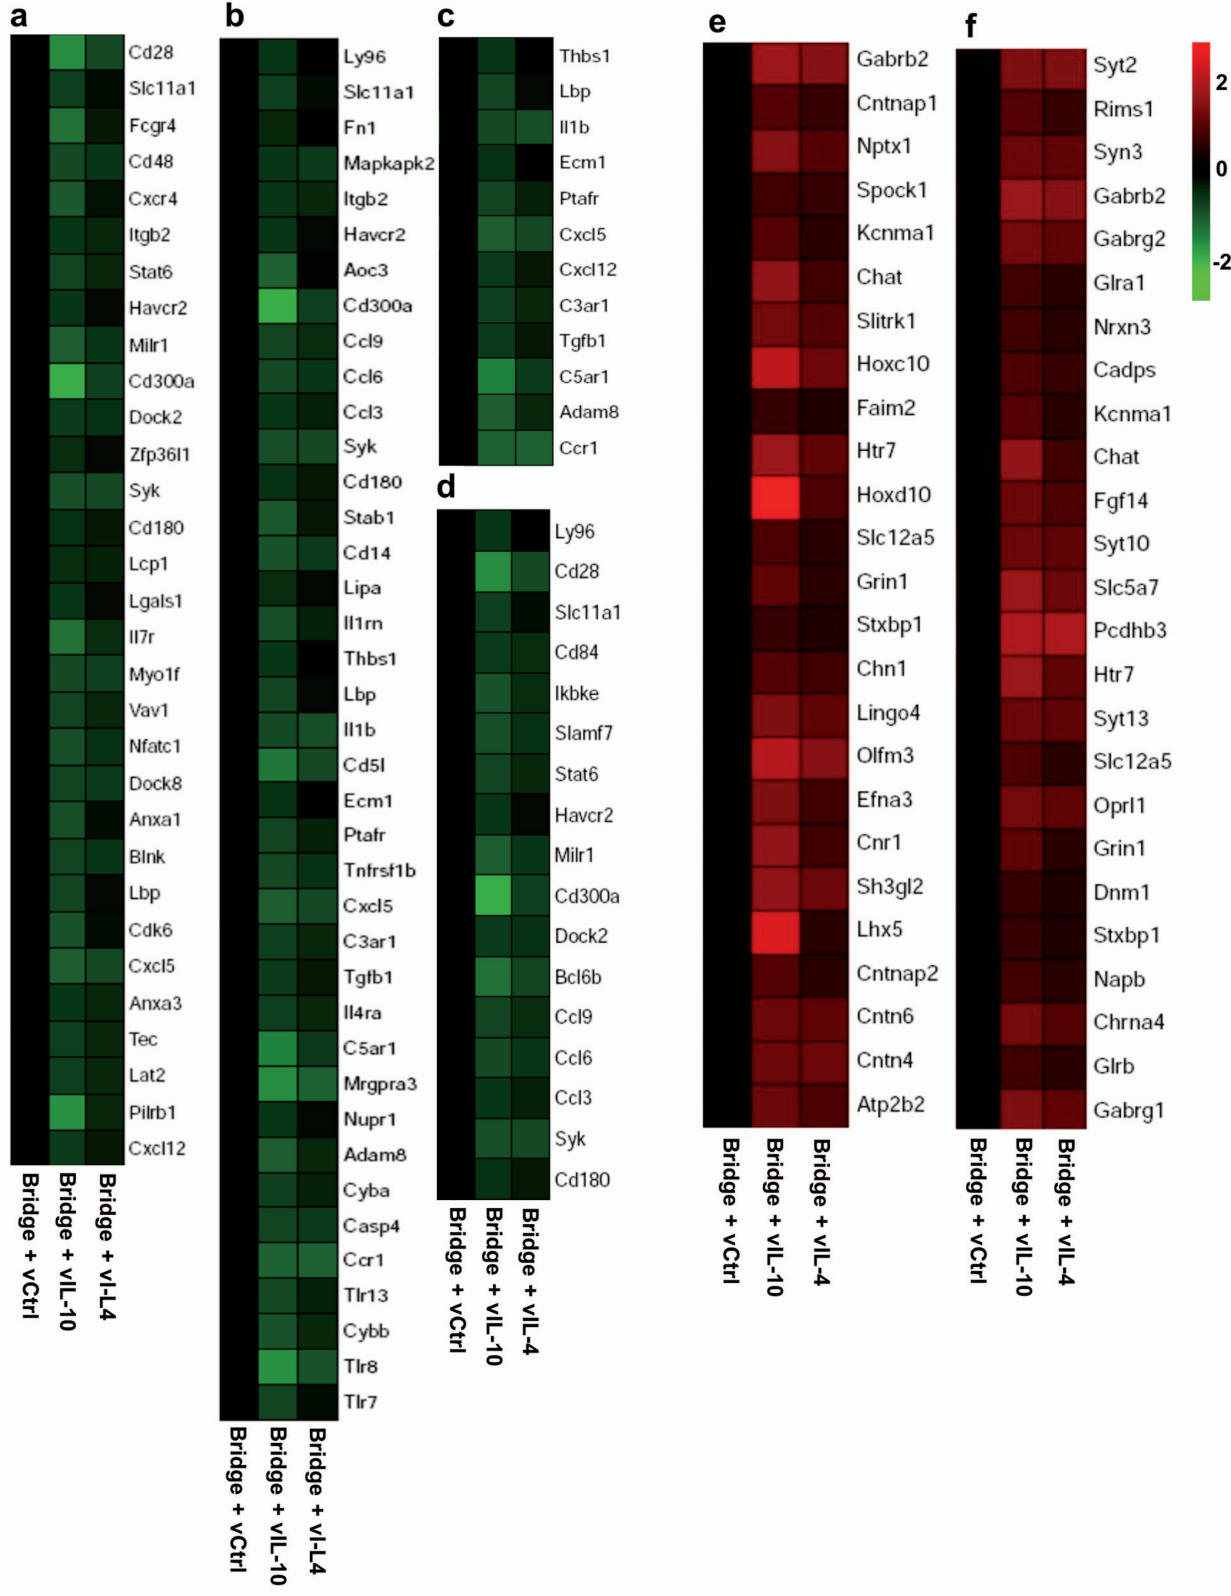

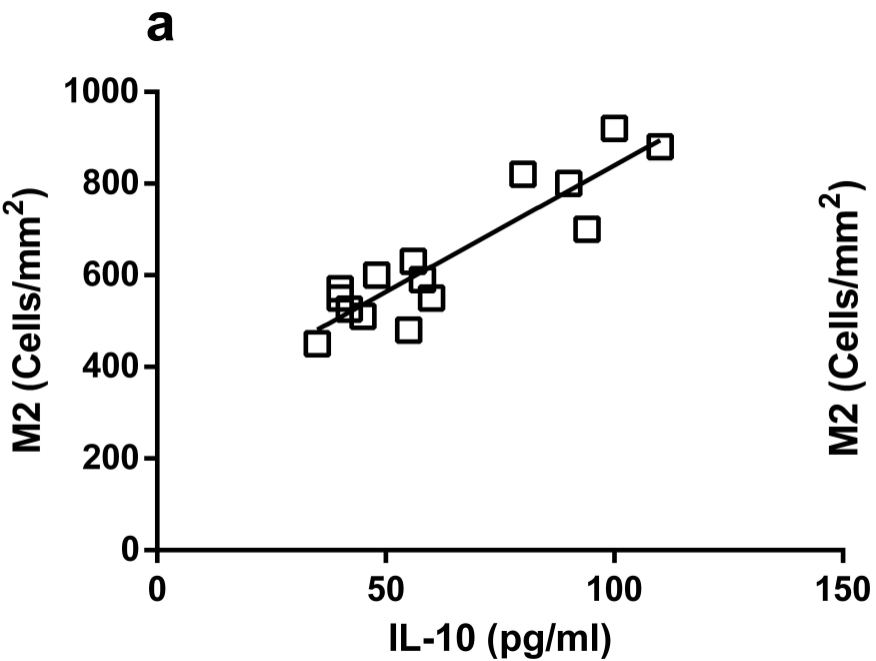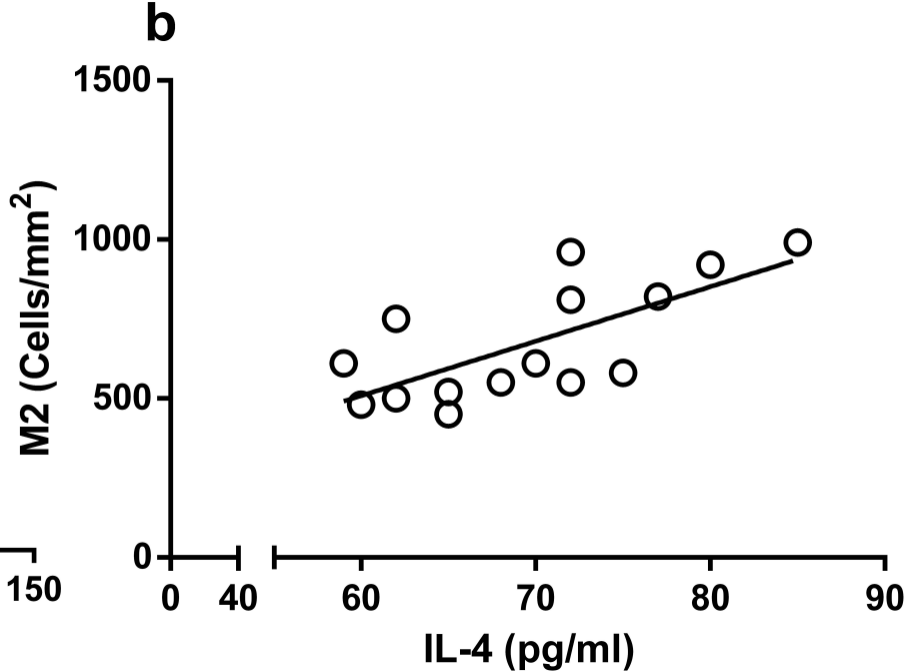

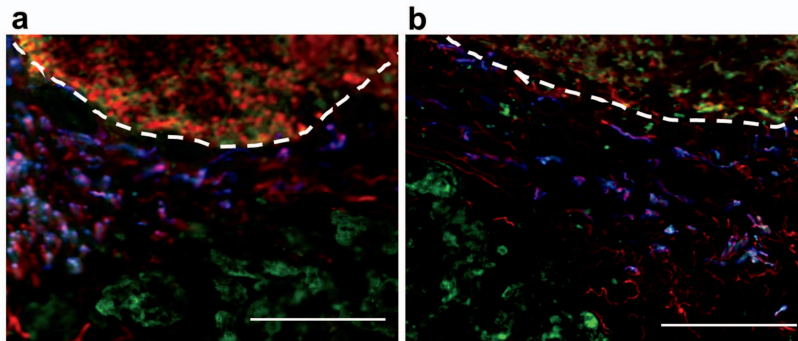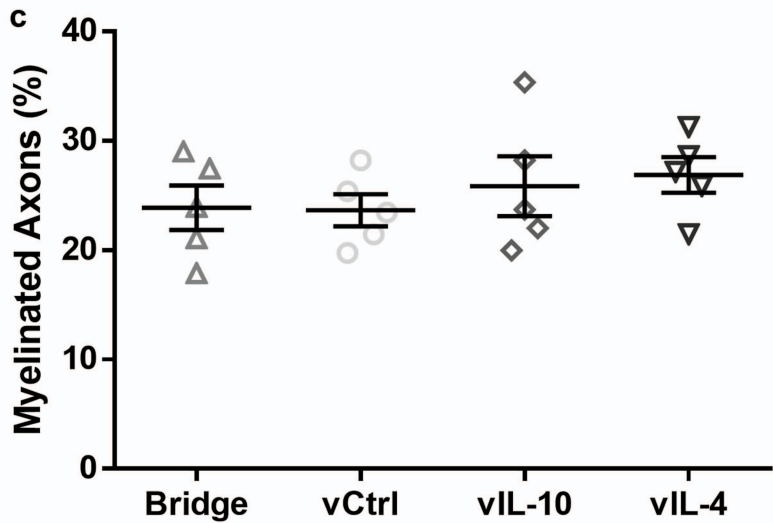

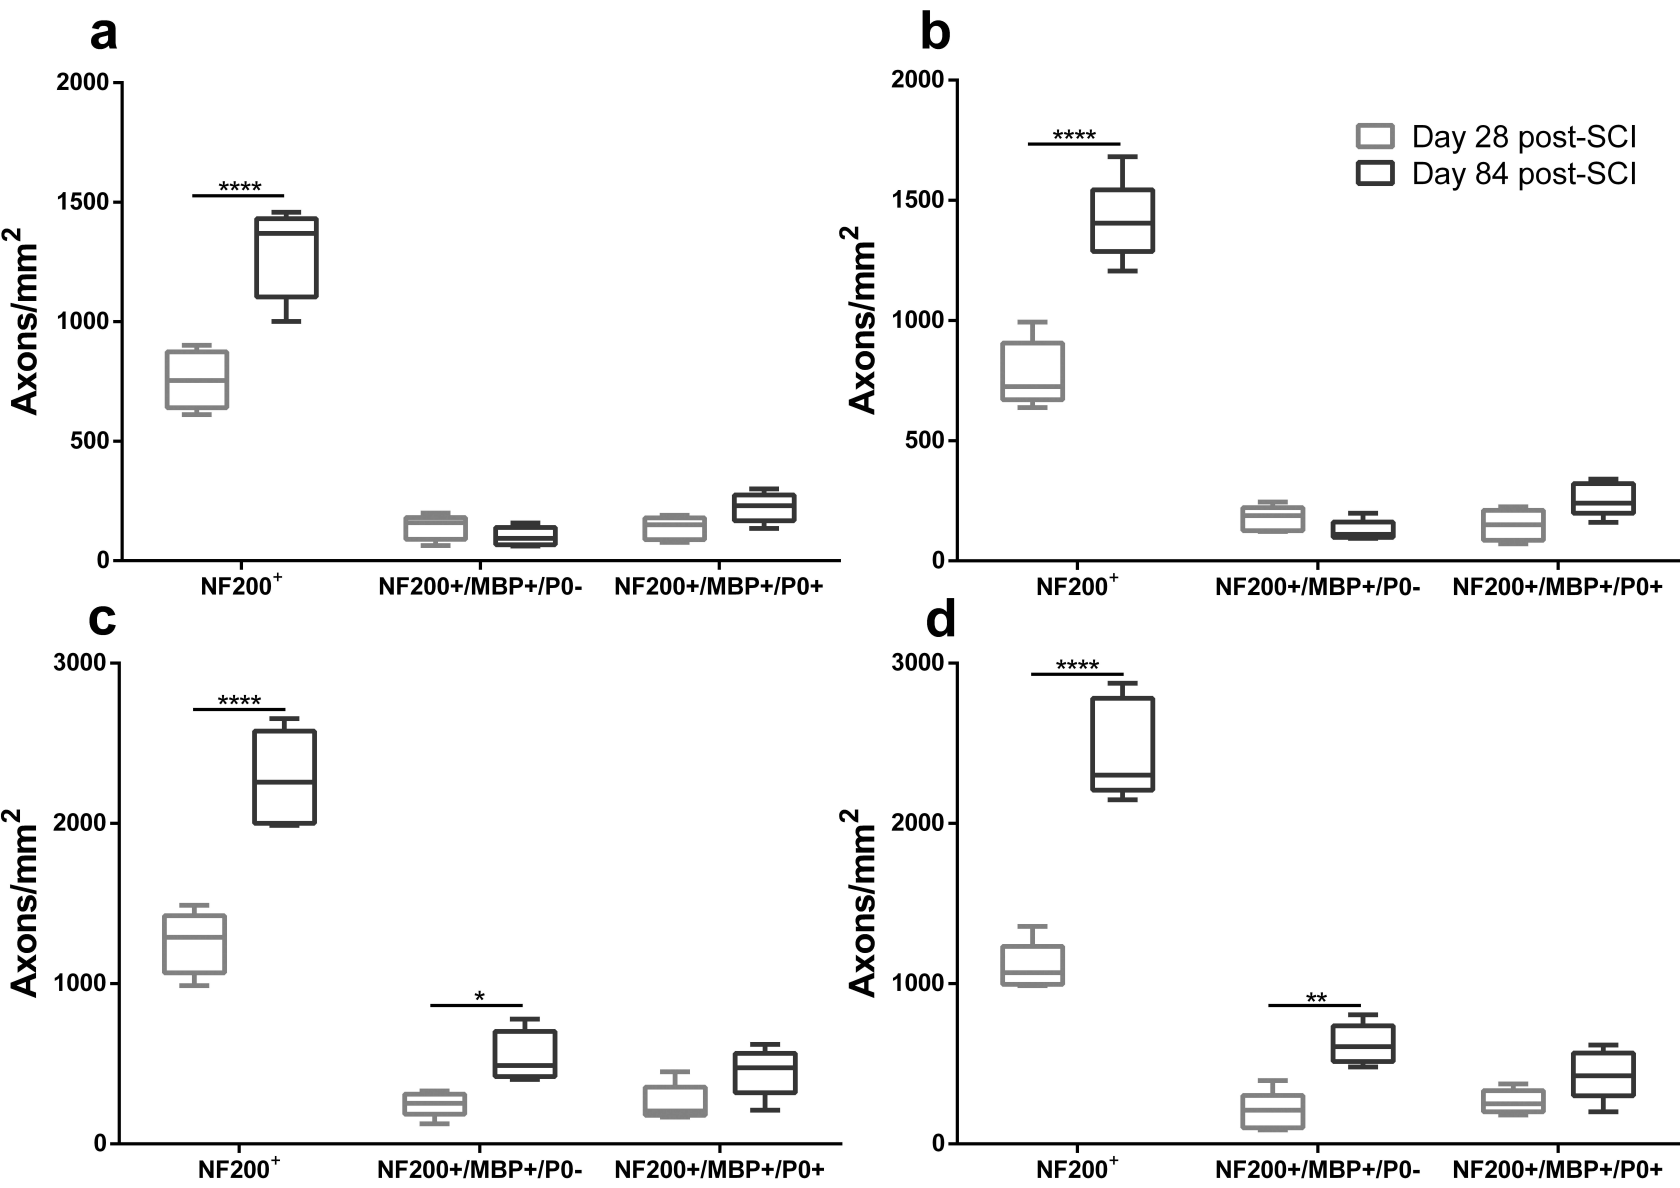

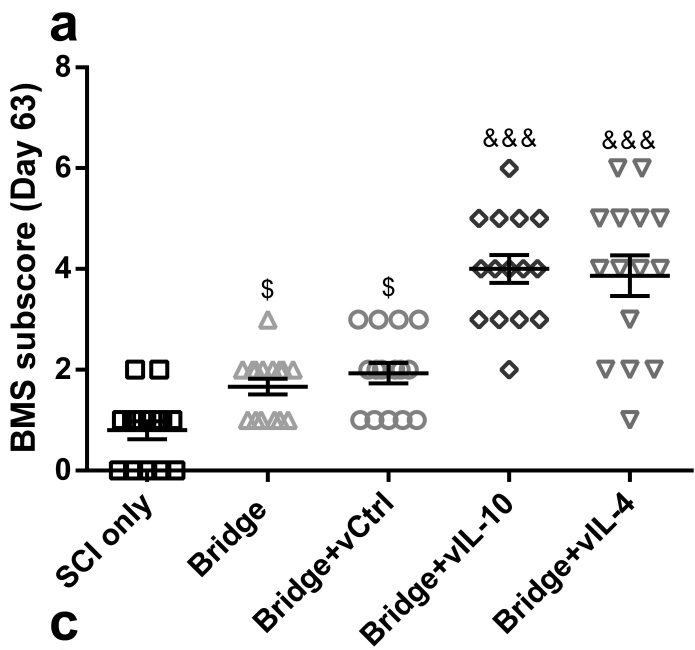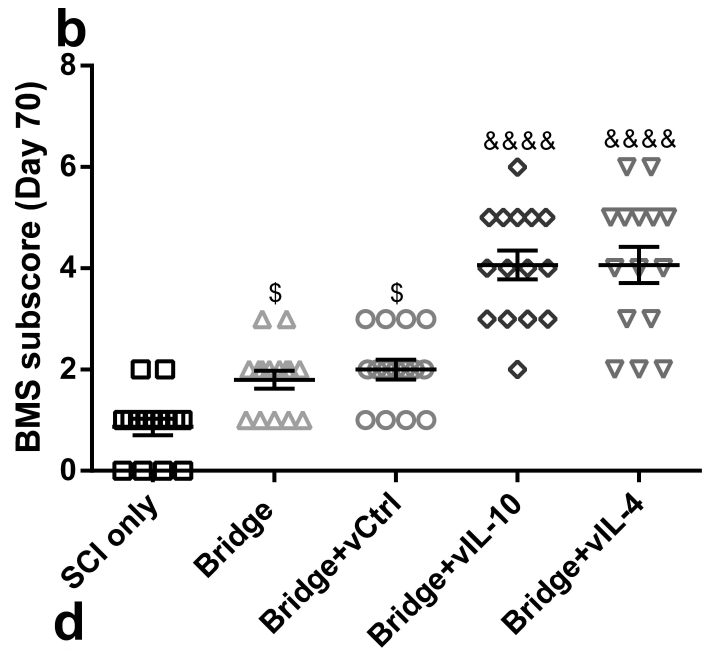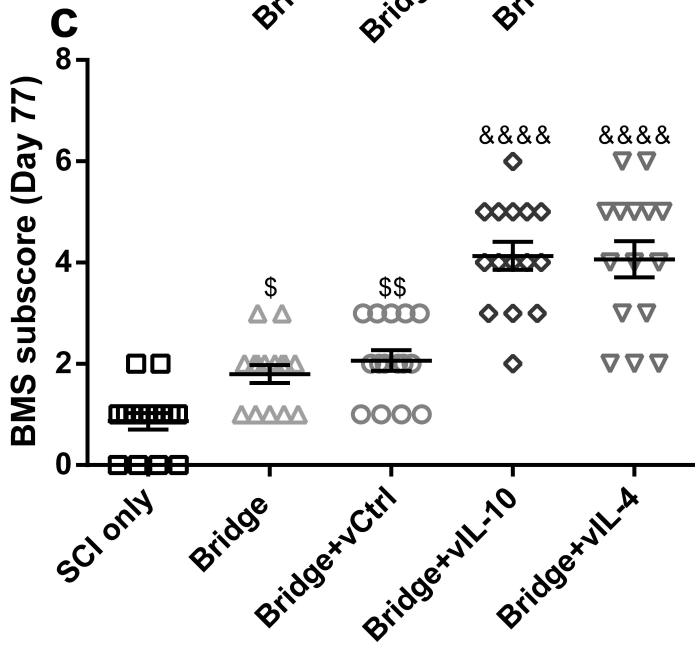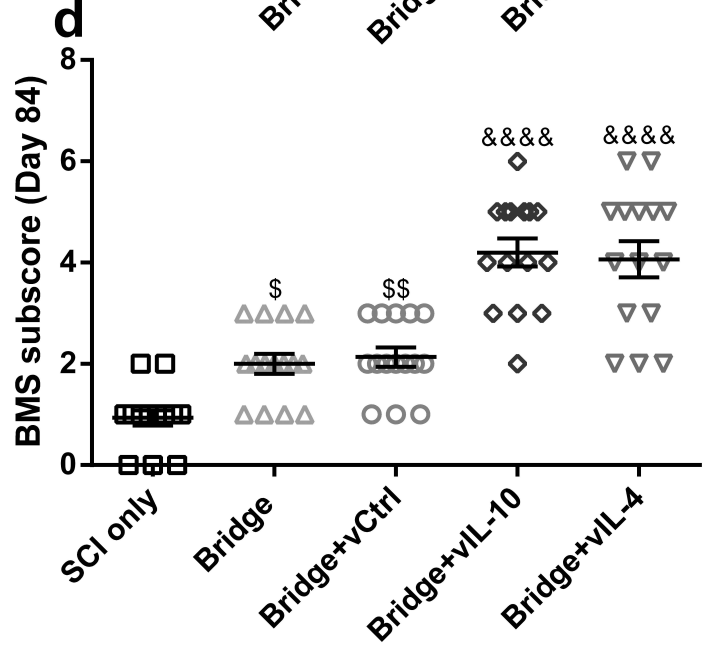

## Supplemental figure legends

**Figure. S1.** PLG multichannel bridge and hemi-sectional SCI model. (a) Photomicrograph of a bridge with 200  $\mu\text{m}$  multichannel. (b) Schematic representation of hemi-section SCI at T9-T10 and multichannel bridge implantation in the injury site. Illustrating approximate bridge dimensions. (c) Schematic multichannel bridge regions where the bridge was divided for analysis. From the rostral edge of the bridge/tissue interface, rostral region analysis was done at 300  $\mu\text{m}$ , middle at 900  $\mu\text{m}$ , and caudal at 1600  $\mu\text{m}$ .

**Figure. S2.** Local delivery of anti-inflammatory cytokine lentiviral vectors alters (a) Leukocyte activation (GO:0045321)-, (b) Inflammatory response (GO:0006954)-, (c) Leukocyte migration (GO:0002685)-, (d) Immune response (GO:0006955)- (e) Neuron differentiation (GO:0030182)- and (f) Synapse organization (GO:0050808)-related gene ontologies at day 7 post-SCI.

**Figure. S3.** Overexpression of anti-inflammatory cytokines influences the number of M2 phenotypes within the bridges. (a) The transgene expression of IL-10 was associated with the increased number of M2 phenotypes (Pearson coefficient=0.9093;  $P<0.0001$ ;  $r^2=0.8268$ ). (b) Overexpression of IL-4 also correlated to increased number of M2 macrophages at the injury site (Pearson coefficient=0.7067;  $P=0.0032$ ;  $r^2=0.4994$ ).

**Figure. S4.** In the sub-acute phase, extensive co-localization of MBP<sup>+</sup> and P0<sup>+</sup> myelin was observed around and outer surface of multichannel bridges in the rostral position for (a) vIL-10 and (b) vIL-4 (scale bar 50  $\mu\text{m}$ ). The dashed lines indicate the interface between bridge implants and spinal cord tissue. (c) Percentage of axons that were myelinated within the bridge area at day 28 post-SCI. No difference was observed between groups. One-way ANOVA with Tukey's post hoc test (mean $\pm$ SEM,  $n=5$ /group).

**Figure. S5.** vIL-10 and vIL-4 delivery increases the number of axons and oligodendrocyte-derived myelinated axons as a function of time at the injury. The total number of axons, oligodendrocyte-derived and Schwann cell-derived myelinated axons were quantified in delivery of (a) bridge only, (b) vCtrl, (c) vIL-10, and (d) vIL-4 in the sub-acute (day 28) and chronic phase (day 84). The statistical tests were completed using a two-way ANOVA with Šidák correction for the multiple comparisons. (\* $P<0.05$ , \*\* $P<0.01$  and \*\*\*\* $P<0.0001$ ,  $n=5$ /group)

**Figure. S6.** Multichannel bridge with anti-inflammatory cytokines improves specific components of locomotion recovery from SCI. (a-d) The BMS subscore in vIL-4 and vIL-10 groups was significantly increased relative to bridge only and vCtrl throughout day 84. Furthermore, bridge itself increased the frequency of plantar stepping and fore limb-hind limb coordination compared to SCI only as a function of time. Statistical test was completed using a one-way ANOVA with Tukey's post hoc test. <sup>s</sup> $P<0.05$ , and <sup>ss</sup> $P<0.01$  compared to SCI only, and <sup>\*\*\*</sup> $P<0.001$  and <sup>\*\*\*\*</sup> $P<0.0001$  compared to vCtrl; mean $\pm$ SEM and  $n=15$ /group



**Table S1.** Gene ontology accession number

| <b>Name</b>                    | <b>Accession Number</b> |
|--------------------------------|-------------------------|
| Inflammatory response          | GO:0006954              |
| Leukocyte activation           | GO:0045321              |
| Nervous system development     | GO:0007399              |
| Locomotor behavior             | GO:0007626              |
| Synapse organization           | GO:0050808              |
| Immune system process          | GO:0002682              |
| Leukocyte migration            | GO:0002685              |
| Immune response                | GO:0006955              |
| Neuron differentiation         | GO:0030182              |
| Chemical synaptic transmission | GO:0007268              |

**Table S2.** Primer sequences for qRT-PCR

| Gene      | Accession number (GenBank) | Forward (5'-3')                | Reverse (5'-3')                |
|-----------|----------------------------|--------------------------------|--------------------------------|
| Ii7r      | NM_008372.4                | GCTGTACACAGTGCAAACCG           | GTGGAGATGGGCTGTCTCTG           |
| Cd28      | NM_007642.4                | TGGCTTGCTAGTGACAGTGG           | CATTGGTGGCCCAGTAGAGG           |
| Cdk6      | NM_009873.3                | GCATCGTGATCTGAAACCGC           | CCACGTCTGAACTTCCACGA           |
| Arginase1 | U51805.1                   | GAACACGGCAGTGGCTTTAAC          | TGCTTAGCTCTGTCTGCTTTGC         |
| CD206     | NM_008625.2                | TCTTTGCCTTTCCAGTCTCC           | TGACACCCAGCGGAATTTCC           |
| Retnla    | NM_020509.3                | GGTCCCAGTGCATATGGATGAGACCATAGA | CACCTCTTCACTCGAGGGACAGTTGGCAGC |
| CD86      | NM_019388.3                | TTGTGTGTGTTCTGGAAACGGAG        | AACTTAGAGGCTGTGTTGCTGGG        |
| iNOS      | U58677.1                   | CCCTTCAATGGTTGGTACATGG         | ACATTGATCTCCGTGACAGCC          |
| MHC-II    | NM_207105.3                | GACGCTCAACTTGTCCCAAAAC         | GCAGCCGTGAACTTGTGAAC           |
| 18s-rRNA  | NR_003278.3                | GCAATTATCCCCATGAACG            | GGCCTCACTAAACCATCCAA-3         |
| Hoxc10    | NM_010462.5                | TGTACAGTGCGAGAGAAGCGG          | GTGTCTGGACTGGAGTCTGC           |
| Chat      | NM_009891.2                | GGCTTTTGTGCAAGCCATGA           | CACAGGGCCATAACAGCAGA           |
| Efna3     | NM_010108.1                | CTACATCTCCACGCCCACTC           | CCTGGGGATTCTCTCCCTCA           |
| Hapln4    | NM_177900.4                | GGTCACAAGATGATCGTGCC           | TGACCTTAAGAAGCCGAGCA           |
| Trpc5     | NM_009428.3                | AACTCCCTCTACCTGGCAAC           | TTCTGCAATCAGAGTCGGGT           |
| Lhx5      | NM_008499.5                | CAGGATCCGTTACAGGACGA           | AACCACACCTGAATGACCCT           |
| Scn1a     | NM_001313997.1             | GTGTGCTCAAGCTCATCTCG           | GCACCTTTGATCAGGCGTAG           |
| Hoxd10    | NM_013554.5                | AACCAGCAATTGGCTCACTG           | TTACTGATCTCTAGGCGGCG           |
| Negr1     | NM_177274.4                | CGGTGCTCAGGTGTTACTTG           | GAAACTCGAGGGTCCACTGA           |
